# Supplementary material for: Au2phen and Auoxo6, Two Dinuclear Oxo-Bridged Gold(III) Compounds, Induce Apoptotic Signaling in Human Ovarian A2780 Cancer Cells
Source: MDPI journal article supplement (doi:10.3390/biomedicines9080871), 2021-07-23
Supplement: s1 [file s1]

## Supporting Information

### Au<sub>2</sub>phen and Auoxo6, two structurally related medicinal gold(III) compounds induce apoptotic signaling in human ovarian A2780 cancer cells

Giulia Gorini <sup>1</sup>, Francesca Magherini <sup>1</sup>, Tania Fiaschi <sup>1</sup>, Lara Massai <sup>2</sup>, Matteo Becatti <sup>1</sup>, Alessandra Modesti <sup>1</sup>, Luigi Messori <sup>2,\*</sup> and Tania Gamberi <sup>1,\*</sup>

<sup>1</sup>Department of Experimental and Clinical Biomedical Sciences, University of Florence, viale Morgagni 50, Firenze, Italy.; gorinigiulia@gmail.com (G.G.); francesca.magherini@unifi.it (F.M.); tania.fiaschi@unifi.it (T.F.); matteo.becatti@unifi.it (M.B.); alessandra.modesti@unifi.it (A.M.).

<sup>2</sup>Department of Chemistry, University of Florence, via della Lastruccia 3-13, 50019, Sesto Fiorentino, Firenze, Italy.; lara.massai@unifi.it (L.Ma.).

\*Correspondence: tania.gamberi@unifi.it; Tel.: +390552751233 (T.G.); luigi.messori@unifi.it; Tel.: +390554573388 (L.Me.).

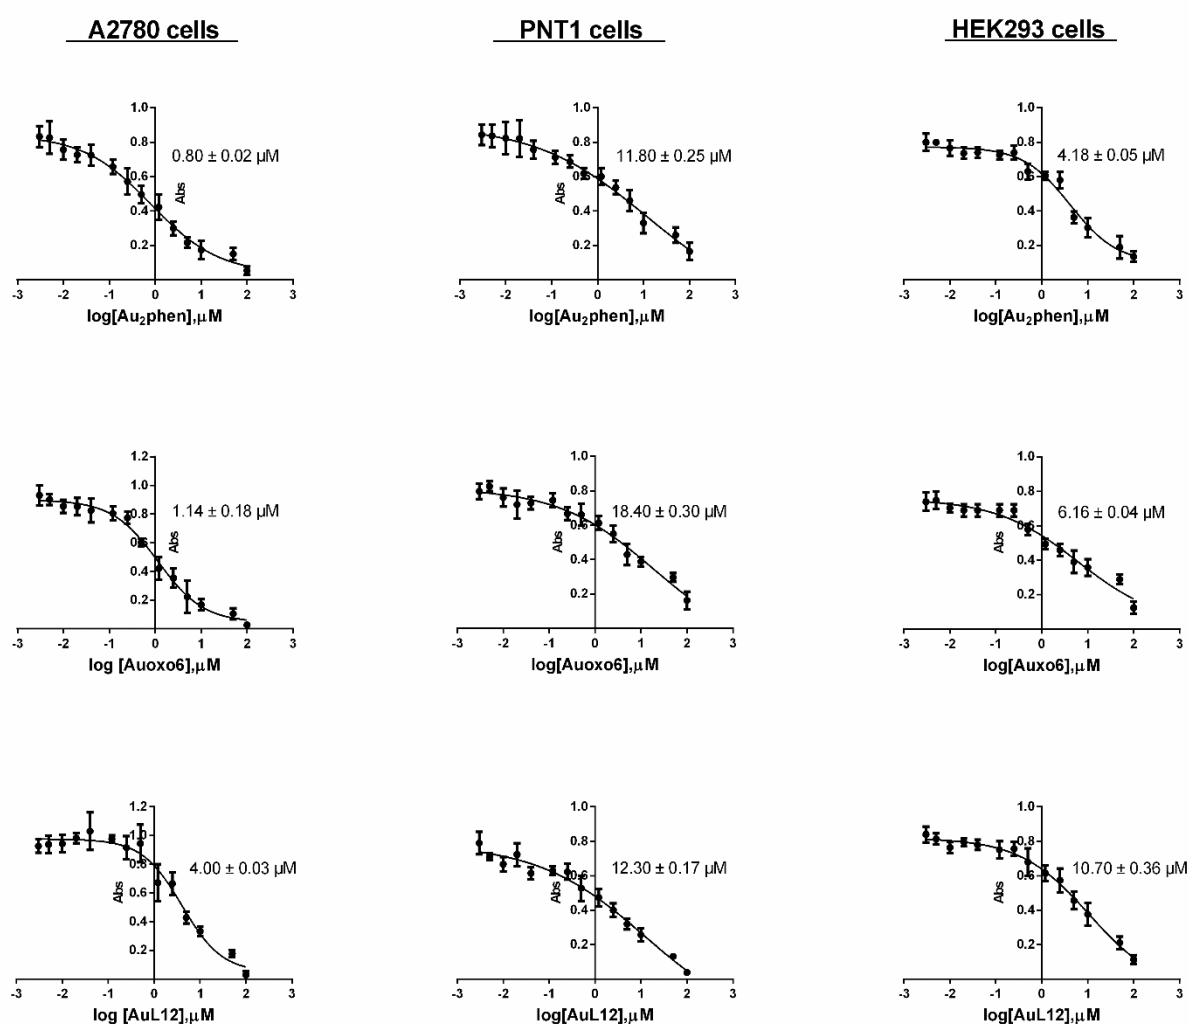

**Figure S1.** Dose-response curves determined using MTT assay. Representative dose-response curves of three independent experiments performed to calculate the half-maximal inhibitory concentration (IC<sub>50</sub>) of the gold compounds Au<sub>2</sub>phen, Auoxo6 and AuL12 after 72 h on A2780 ovarian cancer cell line and on non-tumor cell lines i.e., HEK (human embryonic kidney) and PNT1 (human normal prostate epithelium) cells. Exponentially growing cells were seeded in 96 well-microplates at a density of  $8 \times 10^3$  for 24 h, and then gold compounds were added in fresh RPMI medium at concentrations

ranging from 0.003 to 100  $\mu$ M, and incubated for 72 h. In the figure are also reported the IC<sub>50</sub> mean values and the standard deviation of the three independent experiments (see also Table 1 in the manuscript).

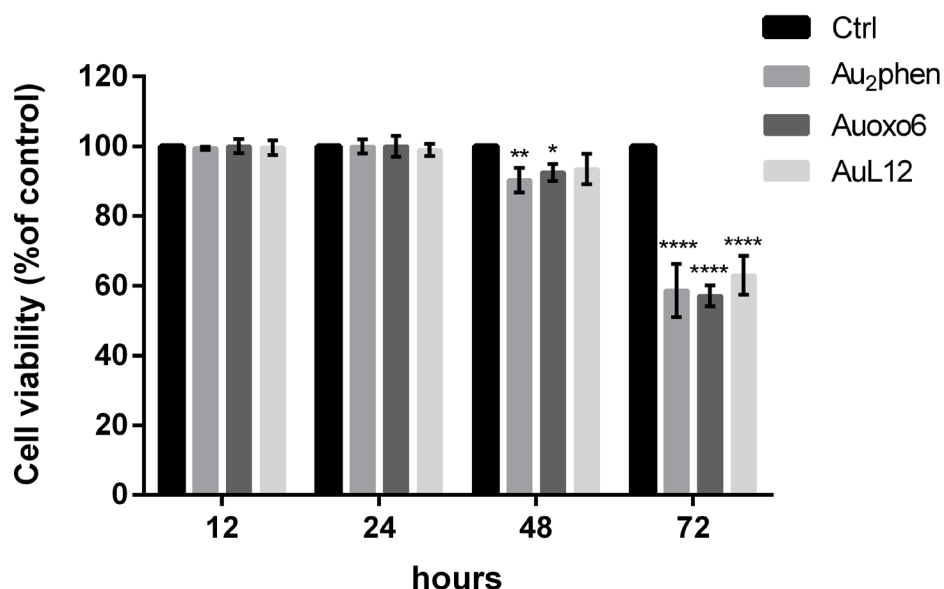

**Figure S2.** Cell viability time course assay upon gold compound treatment. Cell viability of A2780 cancer cells after 12, 24, 48 and 72 h of treatment with the 72 h-IC<sub>50</sub> doses of each gold compound using MTT assay. The experiment was performed in triplicate. The histogram shows the mean values and standard deviation of the percentage of treated-A2780 viable cells relative to untreated controls. The statistical analysis was carried out using one-way ANOVA test followed by Tuckey's multiple comparisons test using Graphpad Prism v 6.0 (\* $p < 0.05$ , \*\* $p < 0.01$ , \*\*\*\* $p < 0.0001$ ). (For details, see also Material and Methods, section 2.4. Study of the cytotoxic effects on A2780 cell line).

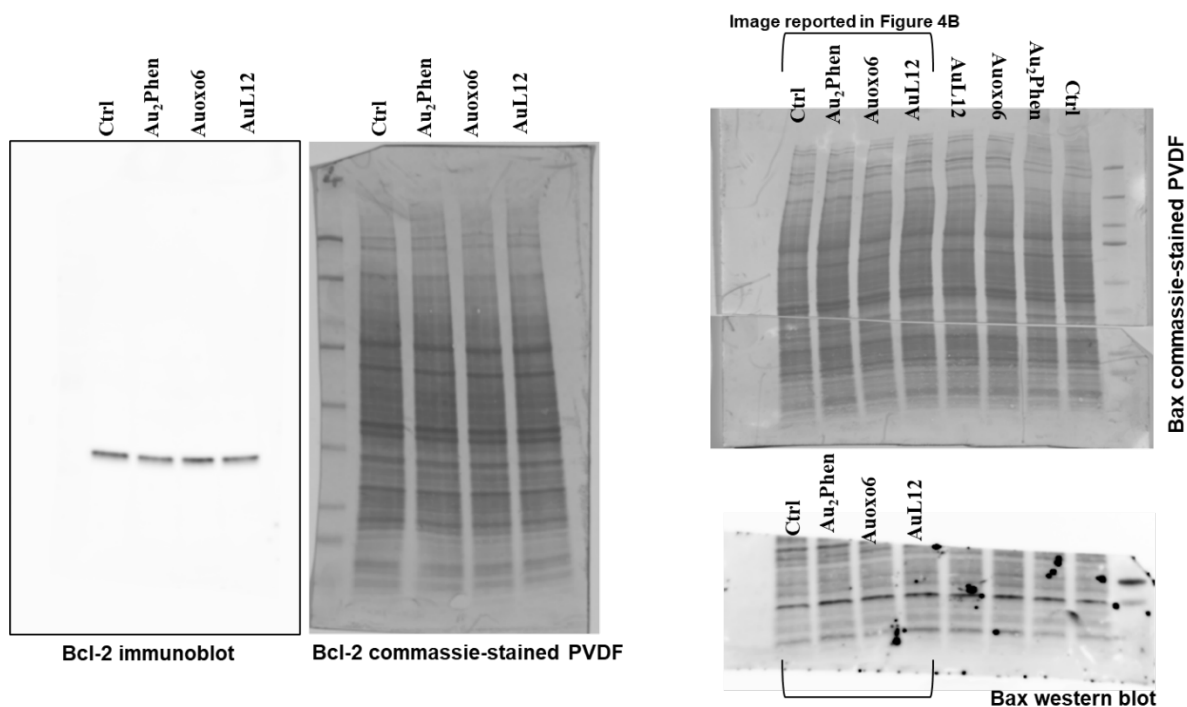

**Figure S3.** Original western blot images of Bcl-2 and Bax content. Original and uncropped western blot images of the representative immunoblots showed in Figure 4B. Their matching coomassie-stained PVDF membranes, used as loading control, are also reported.

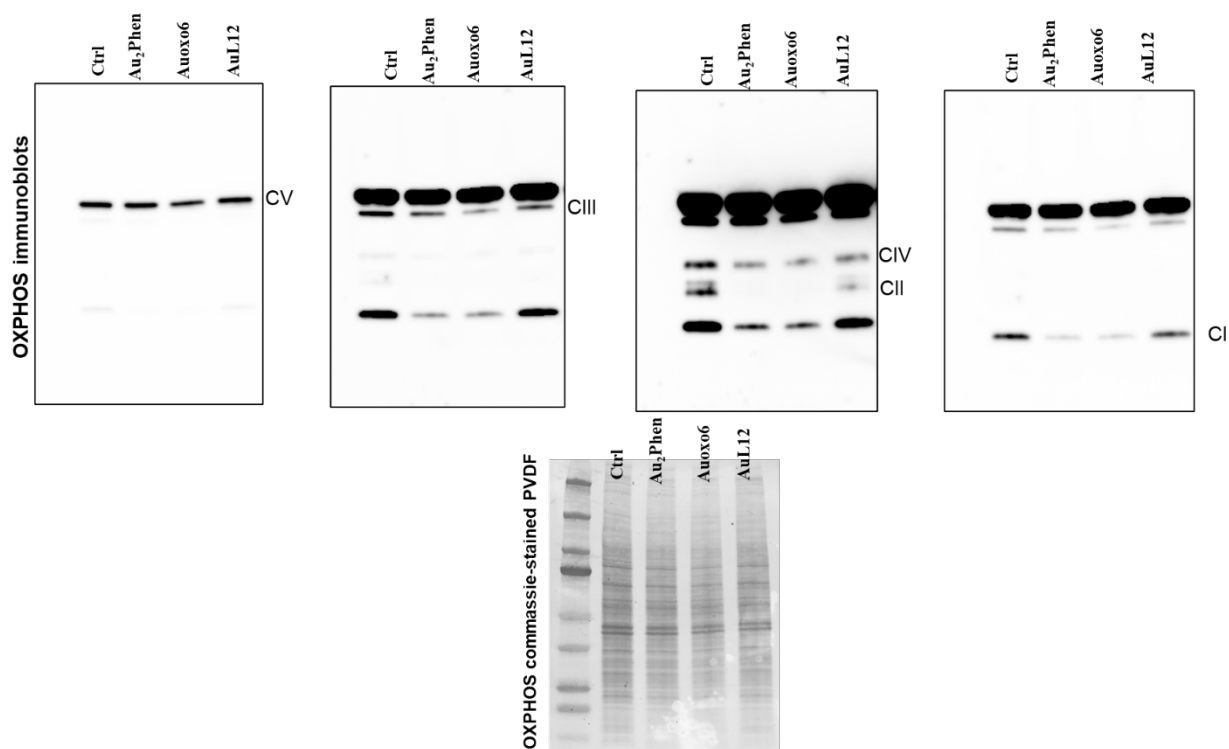

**Figure S4.** Original western blot images of OXPHOS content. Original and uncropped western blot images of the representative immunoblots showed in Figure 5C. Their matching coomassie-stained PVDF membranes, used as loading control, are also reported. Western blot was performed using OXPHOS cocktail (1:1000 dilution, AbCam ab110413) as

reported in Materials and Methods. The immunoreactive bands of each OXPHOS complex were detected at a different exposure time.

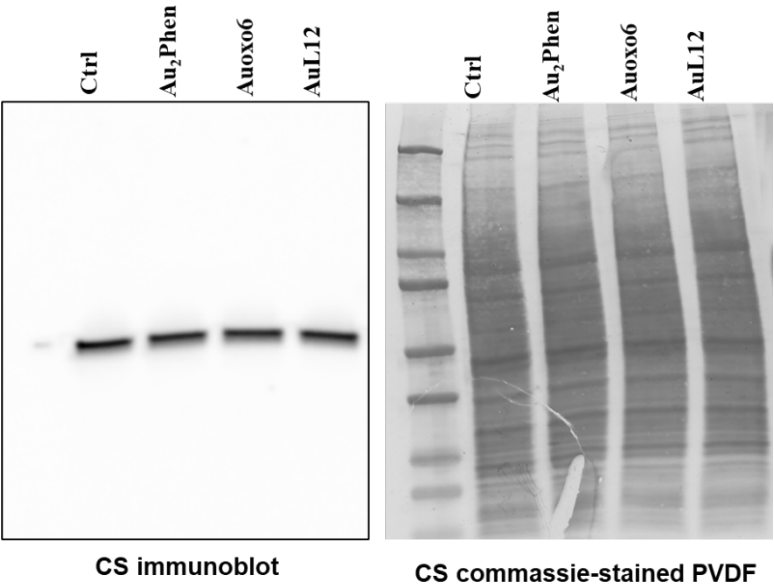

**Figure S5.** Original western blot images of citrate synthase (CS) content. Original and uncropped western blot images of the representative immunoblots showed in Figure 5D. Their matching coomassie-stained PVDF membranes, used as loading control, are also reported.

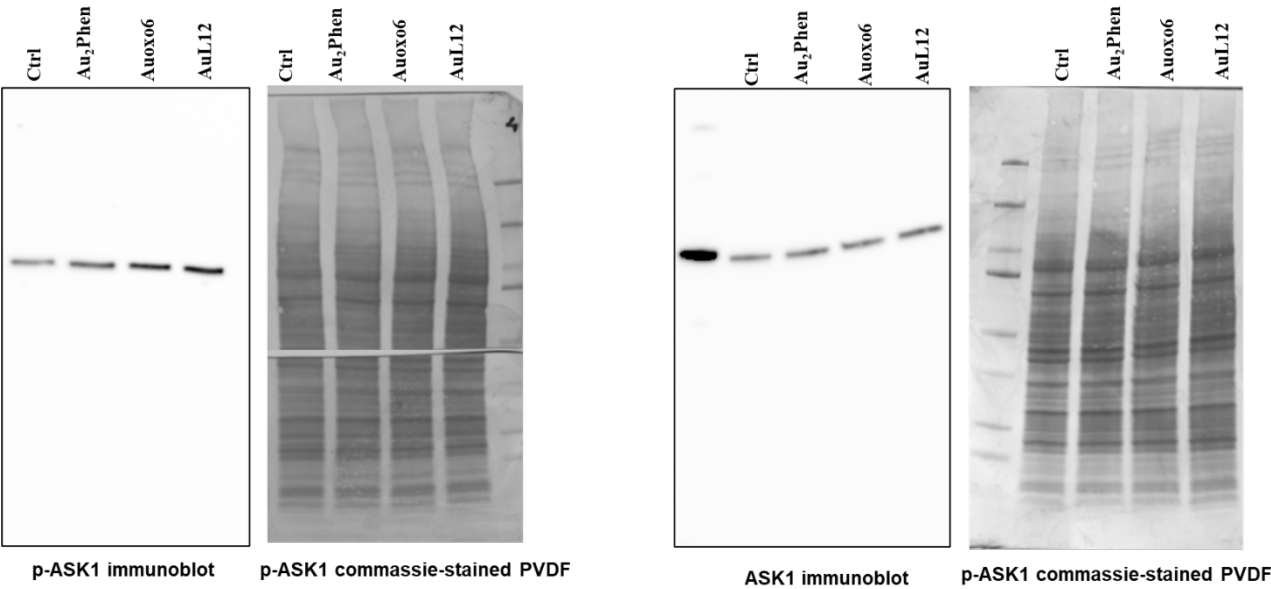

**Figure S6.** Original western blot images of phospho-ASK1 and total ASK1 content. Original and uncropped western blot images of the representative immunoblots showed in Figure 6A. Their matching coomassie-stained PVDF membranes, used as loading control, are also reported.

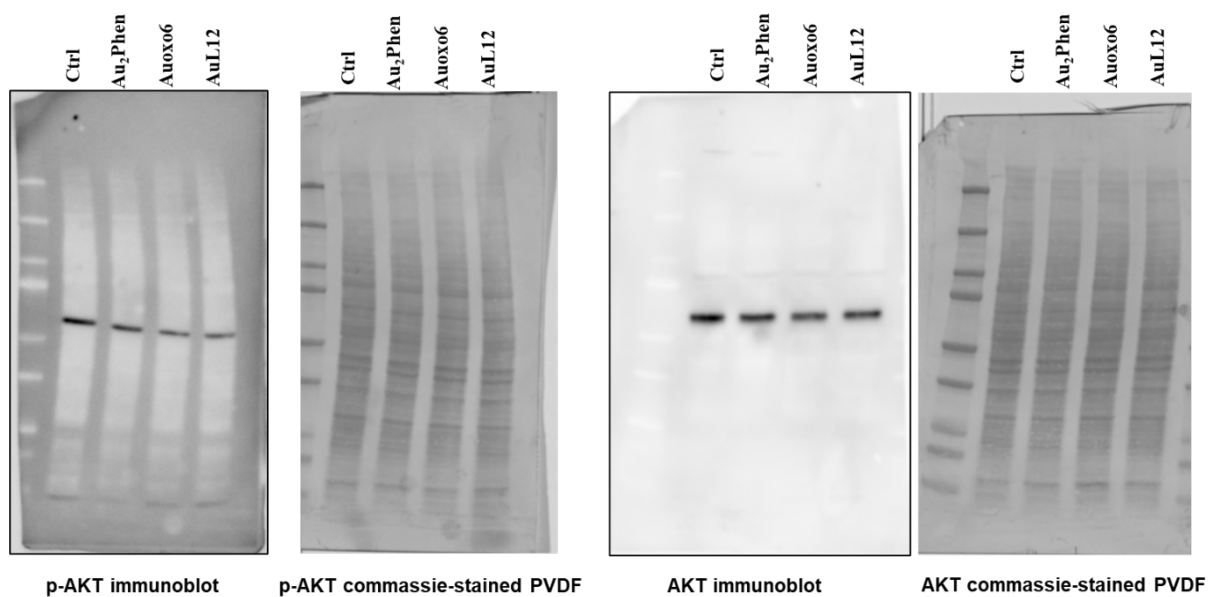

**Figure S7.** Original western blot images of phospho-AKT and total AKT content. Original and uncropped western blot images of the representative immunoblots showed in Figure 6B. Their matching coomassie-stained PVDF membranes, used as loading control, are also reported.
